# Supplementary material
Source: publisher figshare collection journal article supplement (https://karger.figshare.com/ndownloader/files/9500521)
Supplement: Supplementary file 1 [file 9500521]

**Supporting Information**

Additional Supporting Information may be found in the online version of this article.

**Supplemental Table 1.** STROBE checklist.

**Supplemental Table 2.** Databases and coding definitions for exclusion criteria, baseline characteristics, and outcome measurements.

**Supplemental Figure 1.** Cohort selection.

| **Supplemental Table 1. STROBE checklist.**1 | | | |
| --- | --- | --- | --- |
|  | **Item** | **Recommendation** | **Page #** |
| Title and abstract | 1 | (a) Indicate the study’s design with a commonly used term in the title or the abstract | Abstract |
| (b) Provide in the abstract an informative and balanced summary of what was done and what was found | Abstract |
| **Introduction** | | | |
| Background/rationale | 2 | Explain the scientific background and rationale for the investigation being reported | Introduction |
| Objectives | 3 | State specific objectives, including any prespecified hypotheses | Introduction |
| **Methods** | | | |
| Study design | 4 | Present key elements of study design early in the paper | Methods |
| Setting | 5 | Describe the setting, locations, and relevant dates, including periods of recruitment, exposure, follow-up, and data collection | Methods |
| Participants | 6 | (a) Give the eligibility criteria, and the sources and methods of selection of participants. Describe methods of follow-up | Methods |
| (b)For matched studies, give matching criteria and number of exposed and unexposed | Methods |
| Variables | 7 | Clearly define all outcomes, exposures, predictors, potential confounders, and effect modifiers. Give diagnostic criteria, if applicable | Methods  Table S2 |
| Data sources/ measurement | 8 | For each variable of interest, give sources of data and details of methods of assessment (measurement). Describe comparability of assessment methods if there is more than one group | Methods  Table S2 |
| Bias | 9 | Describe any efforts to address potential sources of bias | Methods |
| Study size | 10 | Explain how the study size was arrived at | Figure S1 |
| Quantitative variables | 11 | Explain how quantitative variables were handled in the analyses. If applicable, describe which groupings were chosen and why | Methods |
| Statistical methods | 12 | (a) Describe all statistical methods, including those used to control for confounding | Methods |
| (b) Describe any methods used to examine subgroups and interactions | Methods |
| (c) Explain how missing data were addressed | Methods |
| (d) If applicable, explain how loss to follow-up was addressed | Not applicable |
| (e) Describe any sensitivity analyses | Not applicable |

| **Supplemental Table 1. STROBE checklist (continued).**1 | | | |
| --- | --- | --- | --- |
|  | **Item** | **Recommendation** | **Page #** |
| **Results** | | | |
| Participants | 13 | (a) Report numbers of individuals at each stage of study—e.g. numbers potentially eligible, examined for eligibility, confirmed eligible, included in the study, completing follow-up, and analysed | Figure S1 |
| (b) Give reasons for non-participation at each stage | Figure S1 |
| (c) Consider use of a flow diagram | Figure S1 |
| Descriptive data | 14 | (a) Give characteristics of study participants (e.g. demographic, clinical, social) and information on exposures and potential confounders | Results  Table 1, 4 |
| (b) Indicate number of participants with missing data for each variable of interest | Results |
| (c) Summarise follow-up time (e.g. average and total amount) | Results |
| Outcome data | 15 | Report numbers of outcome events or summary measures over time | Results  Table 2, 3, 5 |
| Main results | 16 | (a) Give unadjusted estimates and, if applicable, confounder-adjusted estimates and their precision (e.g. 95% confidence interval). Make clear which confounders were adjusted for and why they were included | Results  Table 2, 3, 5 |
| (b) Report category boundaries when continuous variables were categorized | Results  Table 1, 4 |
| (c) If relevant, consider translating estimates of relative risk into absolute risk for a meaningful time period | Results |
| Other analyses | 17 | Report other analyses done—e.g. analyses of subgroups and interactions, and sensitivity analyses | Results  Table 3, 5 |
| **Discussion** | | | |
| Key results | 18 | Summarise key results with reference to study objectives | Discussion |
| Limitations | 19 | Discuss limitations of the study, taking into account sources of potential bias or imprecision. Discuss both direction and magnitude of any potential bias | Discussion |
| Interpretation | 20 | Give a cautious overall interpretation of results considering objectives, limitations, multiplicity of analyses, results from similar studies, and other relevant evidence | Discussion |
| Generalisability | 21 | Discuss the generalisability (external validity) of the study results | Discussion |
| **Other information** | | | |
| Funding | 22 | Give the source of funding and the role of the funders for the present study and, if applicable, for the original study on which the present article is based | Disclosure |

| **Supplemental Table 2. Databases and coding definitions for exclusion criteria, baseline characteristics, and outcome measurements.** | | |
| --- | --- | --- |
| **Variable** | **Database** | **Codes** |
| **Exclusion Criteria** | | |
| Kidney transplantation | CIHI-procedure  OHIP-procedurea  CORR | CCP: 67.59  CCI: 1PC85  OHIP: S434, S435  Treatment code: 171  Transplanted organ type code: 10, 11, 12, 18, 19 |
| Dialysis | CIHI-procedure  OHIP-procedurea | CCP: 51.95, 66.98  CCI: 1PZ21  OHIP: G082, G083, G085, G090, G091, G092, G093, G094, G095, G096, G294, G295, G323, G325, G326, G330, G331, G332, G333, G860, G861, G862, G863, G864, G865, G866, H540, H740, R849 |
| Chronic kidney disease | CIHI-diagnostic  OHIP-diagnostic | ICD-9: 250.4, 403.0, 403.1, 403.9, 404.0, 404.1, 404.9, 585, 586, 588.8, 588.9  ICD-10: E10.2, E11.2, E13.2, E14.2, I12, I13, N08, N18, N19  OHIP: 403, 585 |
| **Baseline Characteristics - Demographics** | | |
| Age, Sex, SES, Rural location | RPDB |  |
| Race | CORR  (Racial origin code) | Caucasian: 01; Asian: 02; Black: 03; Indian: 05  Other: 08, 09, 10, 11, 99  Unknown: 98 |

| **Supplemental Table 2. Databases and coding definitions for exclusion criteria, baseline characteristics, and outcome measurements (continued).** | | |
| --- | --- | --- |
| **Variable** | **Database** | **Codes** |
| **Baseline Characteristics – Kidney-Related Characteristics** | | |
| Transplant date | CORR | Treatment date |
| Cause of ESRD | CORR  (Primary diagnosis kidney) | Glomerulonephritis/Auto-immune disease: 05, 06, 07, 08, 09, 10, 11, 12, 13, 14, 15, 16, 17, 19, 73, 74, 84, 85, 86,88  Diabetes: 80, 81  Cystic kidney disease:40,41, 42,43, 49  Renal vascular disease:70, 71, 72,79  Other:20,21, 22,23,24,25, 29,30, 31, 32,33, 39,50, 51, 52, 53, 54, 55, 56, 57,58, 59, 60, 61, 62, 63, 66,78,82, 83,87,89, 90, 91, 92,93, 94, 95, 96, 97, 99  Unknown:00,98 |
| Dialysis modality | CORR (Treatment code) | Hemodialysis: 111, 112, 113, 121, 122, 123, 131, 132, 133, 211, 221, 231, 311, 312, 313, 321, 322, 323, 331, 332, 333, 413, 423, 433  Peritoneal dialysis: 141, 151, 152, 241, 242, 251, 252, 443, 453  Other: 060 |
| Dialysis: | CIHI-procedure  OHIP-procedurea  CIHI-procedure  OHIP-procedurea | Hemodialysis:  CCP: 51.95  CCI: 1PZ21HQBR, 1PZ21HQBS  OHIP: G082, G083, G085, G090, G091, G092, G093, G094, G095, G096, G294, G295, G323, G325, G326, G333, G860, G862, G863, G865, G866, H540, H740, R849  Peritoneal dialysis:  CCP: 66.98  CCI: 1PZ21HPD4  OHIP: G330, G331, G332, G861, G864 |
| Dialysis vintage | CORR | Treatment date |
| Dialysis access | CORR | Dialysis access code |
| Donor type | CORR  (Donor type code) | Living: 02, 03, 04, 05, 06, 07, 10, 12, 15  Deceased: 01  Unknown/Out-of-country transplant: 98 |

| **Supplemental Table 2. Databases and coding definitions for exclusion criteria, baseline characteristics, and outcome measurements (continued).** | | |
| --- | --- | --- |
| **Variable** | **Database** | **Codes** |
| **Baseline Characteristics – Comorbidities** | | |
| VTE | CIHI-diagnostic  CIHI-procedure  OHIP-diagnostic  OHIP-procedurea | ICD-9: 415.0, 415.1, 451.1, 451.2, 451.81, 453.40, 453.41, 671.3, 671.4, 671.9, 673.2, 673.8  ICD-10: I26, I80.1, I80.2, I80.3,I82.2, I82.8, I82.9, O87.1, O87.8, O87.9, O88.2  CCP: 02.87, 50.83  CCI: 3GT20WC, 3GT20WE, 3GT70CA, 3GT70CC, 3GT70CE, 3GT70KC, 3GT70KD, 3GT70KE, 3IM10VC, 3IM10VX, 3IM10VY, 3IM12VA, 3JY10VA, 3JY10VC, 3JY10VN, 3JY10VX, 3JY12VA, 3JY20WC, 3JY20WE, 3KR10VA, 3KR10VC, 3KR10VN, 3KR12VA, 3KX10VA, 3KX10VC, 3KX10VN, 3KX10VX, 3KX12VA, 3KX30DA, 3KX30DB, 3KX30DC, 3KX30DD  OHIP: 415, 451, 671, 677  OHIP: J193, J198, J202, J493, J498, J502, J659, J660, J859, J860, X125, X406, X407 |
| Coronary artery disease | CIHI-diagnostic  CIHI-procedure  OHIP-diagnostic  OHIP-procedurea | ICD-9: 410, 411, 412  ICD-10: I21, I22, T82.2, Z95.5  CCP: 48.01, 48.02, 48.03, 48.04, 48.05, 48.1, 48.2, 48.3  CCI: 1IJ50, 1IJ76  OHIP: 410, 412  OHIP: E646, E651, E652, E654, E655, G298, R741, R742, R743, Z434, Z448 |
| Myocardial infarction | CIHI-diagnostic | ICD-9: 410  ICD-10: I21, I22 |
| Heart failure | CIHI-diagnostic  CIHI-procedure  OHIP-diagnostic | ICD-9: 425, 428, 514, 518.4  ICD-10: I25.5, I50.0, I50.1, I50.9, J81  CCP: 49.61, 49.62, 49.63, 49.64  CCI: 1HP53, 1HP55, 1HZ53GRFR, 1HZ53LAFR, 1HZ53SYFR  OHIP: 428 |
| **Supplemental Table 2.** **Databases and coding definitions for exclusion criteria, baseline characteristics, and outcome measurements (continued).** | | |
| **Variable** | **Database** | **Codes** |
| **Baseline Characteristics – Comorbidities** | | |
| Heart failure  (continued) | OHIP-procedurea | OHIP: R701, R702, Z429 |
| Atial fibrillation/flutter | CIHI-diagnostic | ICD-9: 427.3  ICD-10: I48 |
| Hypertensionb | CIHI-diagnostic  OHIP-diagnostic | ICD-9: 401, 402, 403, 404, 405  ICD-10: I10, I11, I12, I13, I15  OHIP: 401, 402, 403 |
| Diabetes mellitusb | CIHI-diagnostic  OHIP-diagnostic  OHIP-procedurea | ICD-9: 250  ICD-10: E10, E11, E13, E14  OHIP: 250  OHIP: K029, K030, K045, K046, Q040 |
| Ischemic stroke | CIHI-diagnostic | ICD-9: 434, 436  ICD-10: H34.1, I63.0, I63.1, I63.2, I63.3, I63.4, I63.5, I63.8, I63.9, I64 |
| Peripheral vascular disease | CIHI-diagnostic  CIHI-procedure  OHIP-procedurea | ICD-9: 440.2, 440.8, 440.9, 443.9, 444, 557.1  ICD-10: I70.0, I70.2, I70.8, I70.9, I73.1, I73.8, I73.9, K55.1  CCP: 50.14, 50.16, 50.18, 50.28, 50.38, 51.25, 51.26, 51.29, 51.59  CCI: 1IA87LA, 1IB87LA, 1IC87LA, 1ID87, 1KA50, 1KA76, 1KA87LA, 1KE57, 1KE76, 1KG50, 1KG57, 1KG76MI, 1KG87  OHIP: E626, E649, E672, R780, R783, R784, R785, R786, R787, R791, R794, R797, R804, R809, R813, R814, R815, R855, R856, R860, R861, R867, R875, R933, R934, R936, R937 |
| COPD | CIHI-diagnostic | ICD-9: 491, 492, 496  ICD-10: J41, J43, J44 |
| Cancer | CIHI-diagnostic | ICD-9: 140, 141, 142, 143, 144, 145, 146, 147, 148, 149, 150, 151, 152, 153, 154, 155, 156, 157, 158, 159, 160, 161, 162, 163, 164, 165, 170, 171, 172, 173, 174, 175, 176, 179, 180, 181, 182, 183, 184, 185, 186, 187, 188, 189, 190, 191, 192, 193, 194, 195, 196, 197, 198, 199, 200, 201, 202, 203, 204, 205, 206, 207, 208, 230, 231, 232, 233, 234, V10 |
| **Supplemental Table 2. Databases and coding definitions for exclusion criteria, baseline characteristics, and outcome measurements (continued).** | | |
| **Variable** | **Database** | **Codes** |
| **Baseline Characteristics – Comorbidities** | | |
| Cancer (continued) | CIHI-diagnostic | ICD-10: 800.03, 800.06, 800.13, 800.23, 800.33, 800.43, 801.02, 801.03, 801.06, 801.13, 801.23, 802, 803, 804.13, 804.23, 804.33, 804.43, 804.53, 805.02, 805.03, 805.13, 805.23, 807, 808, 809.03, 809.13, 809.23, 809.33, 809.43, 809.53, 811.03, 812.02, 812.03, 812.13, 812.23, 812.33, 812.43, 813.03, 814.02, 814.03, 814.06, 814.13, 814.23, 814.33, 814.43, 814.53, 814.73, 815.03, 815.13, 815.23, 815.33, 815.43, 815.53, 816.03, 816.13, 816.23, 817.03, 817.13, 818.03, 819.03, 820.03, 820.13, 821.02, 821.03, 821.13, 822.03, 822.13, 823, 824.03, 824.13, 824.33, 824.43, 824.53, 824.63, 824.73, 825.03, 825.13, 826.03, 826.12, 826.13, 826.23, 826.32, 826.33, 827.03, 828.03, 828.13, 829.03, 830.03, 831.03, 831.23, 831.43, 831.53, 832.03, 832.23, 832.33, 833.03, 833.13, 833.23, 834.03, 835.03, 837.03, 838.03, 838.13, 839.03, 840.03, 840.13, 841.03, 842.03, 843.03, 844.03, 844.13, 844.23, 845.03, 845.13, 846.03, 846.13, 846.23, 847.03, 847.13, 847.23, 847.33, 848.03, 848.06, 848.13, 849, 850.02, 850.03, 850.12, 850.13, 850.23, 850.32, 850.33, 850.42, 850.43, 851, 852, 853.03, 854, 855.03, 856.03, 856.23, 857, 858.03, 860.03, 862.03, 863.03, 864.03, 865.03, 868.03, 869.33, 870.03, 871.03, 872.02, 872.03, 872.13, 872.23, 872.33, 873.03, 874.03, 874.12, 874.13, 874.22, 874.23, 874.33, 874.43, 874.53, 876.13, 877.03, 877.13, 877.23, 877.33, 877.43, 878.03, 880.03, 880.06, 880.13, 880.23, 880.33, 880.43, 881.03, 881.13, 881.23, 881.33, 881.43, 883.03, 883.23, 883.33, 884.03, 885.03, 885.13, 885.23, 885.33, 885.43, 885.53, 885.83, 889.03, 889.13, 889.43, 889.53, 889.63, 890.03, 890.13, 890.23, 891.03, 892.03, 893.03, 893.33, 894.03, 894.13, 895, 896.03, 896.33, 896.43, 897, 898.03, 898.13, 899.03, 899.13, 900.03, 902.03, 904.03, 904.13, 904.23, 904.33, 904.43, 905.03, 905.13, 905.23, 905.33, 906, 907.03, 907.13, 907.23, 908.03, 908.13, 908.23, 908.33, 908.43, 908.53, 909.03, 910.03, 910.13, 910.23, 911.03, 912.03, 912.43, 913.03, 913.33, 914.03, 915.03, 917.03, 918.03, 918.13, 918.23, 918.33, 918.43, 918.53, 919.03, 922.03, 922.13, 923.03, 923.13, 924.03, 925.03, 925.13, 926.03, 926.13, 927.03, 929.03, 931.03, 933.03, 936.23, 936.43, 937.03, 938.03, 938.13, 938.23, 939.03, 939.13, 939.23, 940, 941, 942, 943.03, 944, 945, 946.03, 947, 948, 949.03, 950.03, 950.13, 950.23, 950.33, 950.43, 951, 952, 953.03, 953.93, 954.03, 956.03, 956.13, 958.03, 958.13, 959, 965, 966, 967, 968, 969, 970, 971, 972, 973, 974.03, 974.13, 976.03, 976.13, 976.23, 976.33, 976.43, 980, 982, 983.03, 984, 985.03, 986, 987.03, 988.03, 989, 990.03, 991.03, 993, 994, C00, C01, C02, C03, C04, C05, C06, C07, C08, C09, C10, C11, C12, C13, C14, C15, C16, C17, C18, C19, C20, C21, C22, C23, C24, C25, C26, C30, C31, C32, C33, C34, C37, C38, C39, C40, C41, C43, C44, C45, C46, C47, C48, C49, C50, C51, C52, C53, C54, C55, C56, C57, C58, C60, C61, C62, C63, C64, C65, C66, C67, C68, C69, C70, C71, C72, C73, C74, C75, C76, C77, C78, C79, C80, C81 |
| **Supplemental Table 2.** **Databases and coding definitions for exclusion criteria, baseline characteristics, and outcome measurements (continued).** | | |
| **Variable** | **Database** | **Codes** |
| **Baseline Characteristics – Comorbidities** | | |
| Cancer (continued) | CIHI-diagnostics  OHIP-diagnostics | ICD-10: C82, C83, C84, C85, C86, C88, C90, C91, C92, C93, C94, C95, C96, C97, D00, D01, D02, D03, D04, D05, D06, D07, D09, Z85  OHIP: 140, 141, 142, 143, 144, 145, 146, 147, 148, 149, 150, 151, 152, 153, 154, 155, 156, 157, 158, 159, 160, 161, 162, 163, 164,165, 170, 171, 172, 173, 174, 175, 179, 180, 181, 182, 183, 184, 185, 186, 187, 188, 189, 190, 191, 192, 193, 194, 195, 196, 197, 198, 199, 200, 201, 202, 203, 204, 205, 206, 207, 208, 230, 231, 232, 233, 234 |
| Delivery | MOMBABYc |  |
| Fracture | CIHI-diagnostics  CIHI-procedure  CIHI-diagnostics  CIHI-procedure  OHIP-procedurea  CIHI-diagnostics  CIHI-diagnostics | Hip: ICD-9: 820.0, 820.1, 820.2, 820.3, 820.8, 820.9 ICD-10: S72.0, S72.1, S72.2  CCP: 90.54, 91.04, 91.14, 91.24, 91.34, 93.5, 93.6 CCI: 1VA53, 1VA73, 1VA74, 1VA80, 1VC73, 1VC74  Shaft of femur: ICD-9: 82.10, 82.11 ICD-10: S723  CCP: 90.54, 91.04, 91.14, 91.24, 91.34 CCI: 1VC03, 1VC73, 1VC74, 1VC80  OHIP: F095, F096, F097, Z211  Pelvis: ICD-9: 80.56, 80.57, 80.8 ICD-10: S321, S322, S323, S324, S325, S327, S328  Ankle: ICD-9: 82.40, 82.41, 82.42, 82.43, 82.44, 82.45, 82.46, 82.47, 82.48, 82.49 ICD-10: S825, S826, S827, S828, S829 |
| **Supplemental Table 2.** **Databases and coding definitions for exclusion criteria, baseline characteristics, and outcome measurements (continued).** | | |
| **Variable** | **Database** | **Codes** |
| **Baseline Characteristics – Comorbidities** | | |
| Fracture (continued) | CIHI-diagnostics  CIHI-diagnostics | Patella: ICD-9: 82.2 ICD-10: S820  Tibia/fibula: ICD-9: 82.3 ICD-10: S821, S822, S823, S824 |
| Surgery | OHIP-procedurea | OHIP: R107, R108, R109, R110, R111, R112, R113, R114, R115, R116, R117, R118, R119, R120, R121, R122, R123, R124, R143, R144, R145, R146, R147, R148, R149, R150, R151, R152, R153, R154, R155, R156, R181, R182, R191, R192, R193, R194, R915, R196, R197, R198, R199, R200, R201, R202, R203, R204, R205, R206, R207, R208, R209, R210, R211, R212, R213, R214, R215, R216, R217, R218, R219, R220, R221, R222, R223, R224, R225, R226, R227, R228, R229, R230, R231, R232, R233, R234, R235, R236, R237, R238, R239, R240, R241, R242, R243, R244, R245, R246, R247, R248, R249, R250, R251, R252, R253, R254, R255, R256, R257, R258, R259, R260, R261, R262, R263, R264, R265, R266, R267, R268, R269, R270, R271, R272, R273, R274, R275, R276, R277, R278, R279, R280, R281, R282, R283, R284, R285, R286, R287, R288, R289, R290, R291, R292, R293, R294, R295, R296, R297, R298, R299, R301, R302, R303, R304, R305, R306, R307, R308, R309, R310, R311, R312, R313, R314, R315, R316, R317, R318, R319, R320, R321, R322, R323, R324, R325, R326, R327, R328, R329, R330, R331, R332, R333, R334, R335, R336, R337, R338, R339, R340, R341, R342, R343, R344, R345, R346, R347, R348, R349, R350, R351, R352, R353, R354, R355, R356, R357, R358, R359, R360, R361, R362, R363, R364, R365, R366, R367, R368, R369, R370, R371, R372, R373, R374, R376, R378, R379, R380, R381, R382, R383, R384, R385, R386, R387, R388, R389, R390, R391, R392, R393, R394, R395, R396, R397, R398, R399, R400, R401, R402, R403, R404, R405, R406, R407, R408, R409, R410, R411, R412, R413, R414, R415, R416, R417, R418, R419, R420, R421, R422, R423, R424, R425, R426, R427, R428, R429, R430, R431, R432, R433, R434, R435, R436, R437, R438, R439, R440, R441, R442, R443, R444, R445, R446, R447, R448, R449, R450, R451, R452, R453, R454, R455, R456, R457, R458, R459, R460, R461, R461, R463, R464, R465, R467, R468, R469, R470, R471, R472, R473, R474, R475, R476, R477, R478, R479, R480, R481, R482, R483, R484, R485, R486, R487, R488, R489, R490, R491, R492, R493, R494, R495, R495, R496, R497, R498, R499, R500, R501, R502, R503, R504, R505, R506, R507, R508, R509, R510, R511, R512, R513, R514, R515, R516, R517 |

| **Supplemental Table 2.** **Databases and coding definitions for exclusion criteria, baseline characteristics, and outcome measurements (continued).** | | |
| --- | --- | --- |
| **Variable** | **Database** | **Codes** |
| **Baseline Characteristics – Comorbidities** | | |
| Surgery (continued) | OHIP-procedure | OHIP: R518, R519, R520, R521, R522, R523, R524, R525, R526, R527, R528, R529, R530, R531, R532, R533, R534, R535, R536, R537, R538, R539, R540, R541, R542, R543, R544, R545, R546, R547, R548, R549, R550, R551, R552, R553, R554, R555, R556, R557, R558, R559, R560, R561, R562, R563, R564, R565, R566, R567, R568, R569, R570, R571, R572, R573, R574, R575, R576, R577, R578, R579, R580, R581, R582, R583, R584, R585, R586, R587, R588, R589, R590, R591, R592, R593, R594, R595, R596, R597, R598, R599, R600, R601, R602, R603, R606, R607, R608, R609, R610, R611, R612, R613, R614, R615, R616, R617, R618, R619, R620, R621, R622, R623, R624, R625, R626, R627, R628, R629, R630, R631, R632, R633, R634, R635, R636, R637, R638, R639, R640, R641, R642, R643, R644, R645, R646, R647, R648, R649, R650, R651, R652, R653, R654, R655, R656, R657, R657, R659, R675, R676, R677, R678, R679, R680, R681, R682, R683, R684, R685, R686, R687, R688, R689, R690, R691, R692, R693, R694, R695, R696, R697, R698, R700, R701, R702, R703, R704, R705, R706, R706, R708, R709, R710, R711, R712, R713, R714, R715, R716, R717, R718, R719, R720, R721, R722, R723, R724, R725, R726, R727, R728, R729, R730, R733, R734, R735, R736, R737, R738, R741, R742, R743, R746, R747, R748, R749, R750, R751, R752, R753, R754, R755, R756, R757, R758, R759, R760, R761, R762, R763, R764, R765, R768, R769, R770, R771, R772, R773, R774, R775, R776, R778, R780, R781, R783, R784, R785, R786, R787, R788, R789, R790, R791, R792, R794, R795, R796, R797, R798, R799, R800S002, S003, S004, S005, S006, S007, S010, S011, S012, S013, S014, S015, S018, S019, S020, S021, S023, S024, S025, S028, S030, S031, S032, S033, S034, S035, S036, S042, S043, S044, S045, S046, S047, S049, S050, S057, S058, S059, S061, S062, S063, S065, S066, S067, S068, S069, S073, S074, S075, S080, S081, S082, S083, S084, S085, S086, S087, S088, S089, S090, S091, S092, S093, S095, S096, S097, S098, S099, S100, S102, S103, S104, S113, S114, S115, S116, S117, S118, S119, S120, S121, S122, S123, S124, S125, S128, S129, S131, S132, S133, S134, S135, S137, S138, S139, S140, S149, S150, S151, S154, S155, S156, S157, S158, S159, S160, S161, S162, S164, S165, S166, S167, S168, S169, S170, S171, S172, S173, S174, S175, S176, S177, S178, S179, S180, S181, S182, S183, S184, S185, S187, S188, S189, S191, S192, S193, S194, S195, S196, S197, S199, S201, S202, S203, S204, S205, S206, S208, S209, S213, S214, S215, S216, S217, S218, S222, S223, S225, S226, S227, S228, S229, S231, S233, S234, S236, S237, S241, S242, S243, S246, S247, S248, S249, S251, S253, S256, S257, S258, S259, S260, S265, S266, S267, S268, S269, S270, S271, S272, S273, S274, S275, S276 |
| **Supplemental Table 2.** **Databases and coding definitions for exclusion criteria, baseline characteristics, and outcome measurements (continued).** | | |
| **Variable** | **Database** | **Codes** |
| **Baseline Characteristics – Comorbidities** | | |
| Surgery (continued) | OHIP-procedure | OHIP: S278, S280, S281, S282, S283, S284, S285, S287, S291, S292, S293, S294, S295, S297, S298, S299, S300, S301, S302, S303, S304, S305, S306, S307, S308, S309, S310, S311, S312, S313, S314, S315, S316, S317, S318, S319, S320, S321, S322, S323, S325, S326, S328, S329, S330, S332, S334, S335, S336, S337, S338, S339, S340, S342, S343, S344, S347, S348, S349, S355, S372, S400, S401, S402, S403, S404, S405, S406, S407, S408, S409, S410, S411, S412, S413, S415, S416, S417, S418, S420, S421, S422, S423, S424, S426, S427, S428, S429, S430, S431, S432, S433, S434, S435, S436, S437, S438, S440, S441, S442, S443, S444, S445, S446, S447, S448, S449, S450, S451, S452, S453, S455, S454, S456, S457, S458, S459, S460, S461, S462, S463, S465, S466, S467, S468, S470, S471, S476, S477, S478, S479, S480, S481, S482, S483, S484, S485, S487, S488, S489, S490, S491, S502, S512, S513, S518, S519, S520, S521, S522, S523, S524, S525, S530, S531, S532, S533, S534, S535, S536, S537, S538, S539, S540, S541, S542, S543, S544, S545, S546, S547, S548, S549, S550, S551, S552, S553, S554, S555, S556, S557, S558, S559, S560, S561, S562, S563, S564, S566, S567, S568, S569, S570, S571, S572, S573, S574, S575, S576, S577, S578, S579, S580, S588, S589, S590, S591, S592, S593, S595, S596, S597, S598, S599, S600, S601, S602, S606, S611, S616, S618, S619, S623, S625, S626, S630, S631, S636, S640, S641, S642, S643, S644, S645, S646, S647, S648, S649, S650, S651, S652, S653, S654, S655, S656, S700, S701, S702, S703, S704, S705, S706, S706, S707, S708, S709, S710, S711, S712, S713, S714, S715, S716, S717, S718, S719, S720, S721, S722, S723, S724, S725, S726, S727, S728, S729, S730, S731, S732, S733, S734, S735, S736, S737, S738, S739, S740, S741, S742, S743, S744, S745, S746, S747, S748, S749, S750, S751, S752, S753, S754, S755, S756, S757, S758, S759, S760, S761, S762, S763, S764, S765, S766, S767, S768, S769, S770, S771, S772, S773, S774, S775, S776, S777, S778, S779, S780, S781, S782, S783, S784, S785, S786, S787, S788, S790, S791, S792, S793, S795, S796, S797, S798, S799, S800, S805, S806, S807, S808, S810, S811, S812, S813, S815, S816, S900 |

| **Supplemental Table 2.** **Databases and coding definitions for exclusion criteria, baseline characteristics, and outcome measurements (continued).** | | |
| --- | --- | --- |
| **Variable** | **Database** | **Codes** |
| **Outcome Measurements** | | |
| VTE | As above | As above |
| Death | RPDB | Vital status field |
| Graft loss | CORR | Chronic dialysis:  Treatment code ≠ 171 or 181  Kidney transplant:  Treatment code = 171  Transplanted organ type code: 10, 11, 12, 18, 19 |
| a Approximately 95% of Ontario physicians operate under the fee for service payment structure of the Ontario Health Insurance Plan (OHIP). The sensitivity and positive predictive value of these procedure codes is expected to be high, as shown with other service payments. Other studies have reported the value of using physician billing data in combination with other administrative healthcare data to improve the identification of relevant procedures.  b Defined as evidence of 2 OHIP claims or 1 hospitalization with a diagnostic claim within the 3-year look-back window.  c This dataset links inpatient admission records from CIHI of delivering mothers and their newborns.  Abbreviations: CCI, Canadian Classification of Health Interventions; CCP, Canadian Classification of Diagnostic, Therapeutic and Surgical Procedures;CIHI, Canadian Institute for Health Information;COPD, chronic obstructive pulmonary disease;CORR, Canadian Organ Replacement Register;ESRD, end-stage renal disease;ICD-9; International Classification of Diseases, 9th Revision; ICD-10, International Classification of Diseases, 10th Revision;OHIP, Ontario Health Insurance Plan; RPDB, Registered Persons Database;SES, socioeconomic status; VTE, venous thromboembolism. | | |

**Supplemental Figure 1**:Cohort selection.

**Exclusion Criteria (n=895):**

- <18 years old (n=171)

- Repeat/previous organ transplant (n=471)

- Simultaneous multi-organ transplant (n=253)

**Ontario Kidney Transplant Recipients**

**From 2003-2013**

**n=5238**

**Kidney Transplant Recipients**

**n=4343**
